# Supplementary material
Source: publisher figshare collection journal article supplement (https://tandf.figshare.com/articles/dataset/_/23213185)

(a)

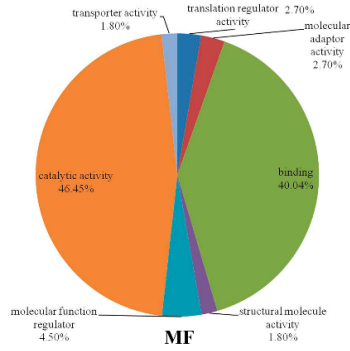

(b)

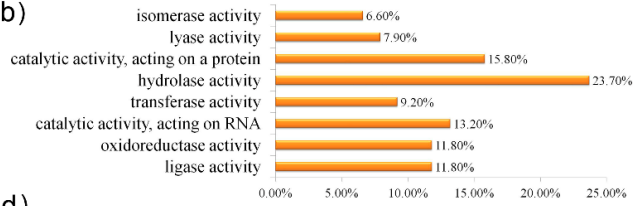

(d)

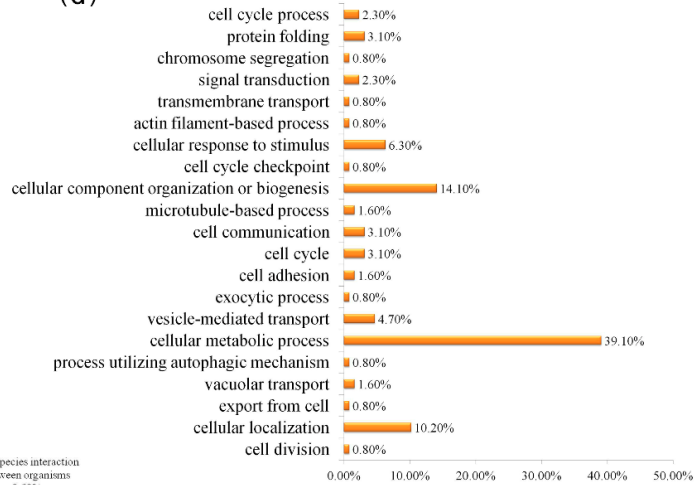

(c)

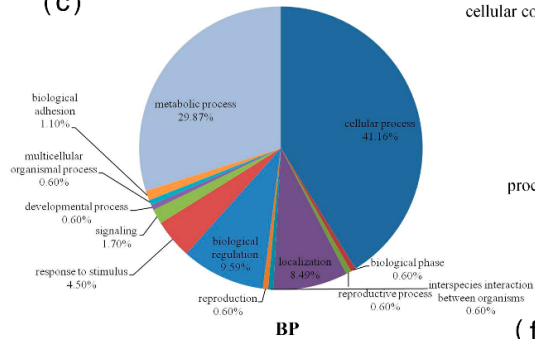

(e)

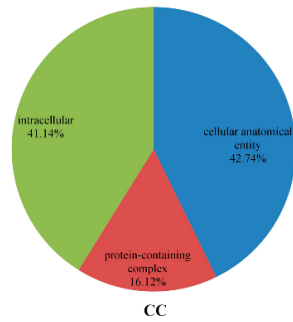

(f)

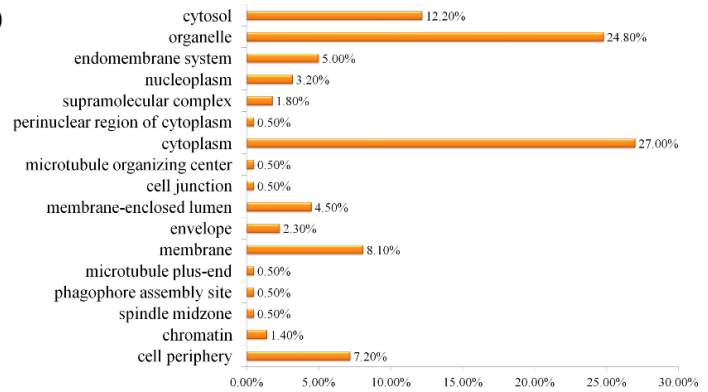

Supplement: Supplementary file 1 [file 1]

(a)

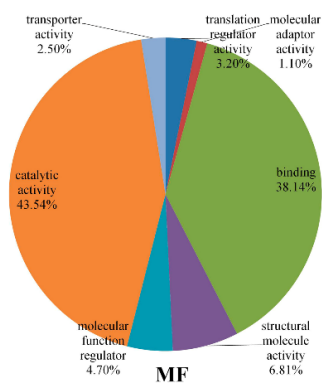

(c)

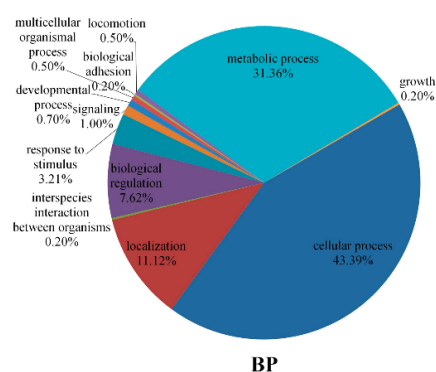

(e)

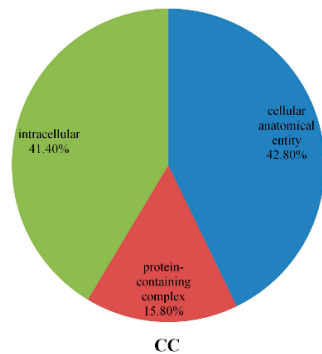

(b)

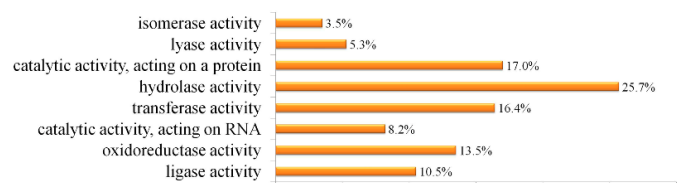

(d)

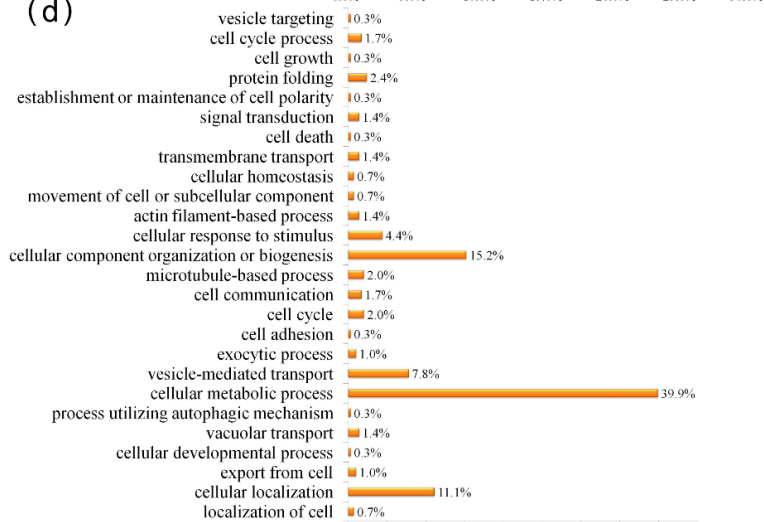

(f)

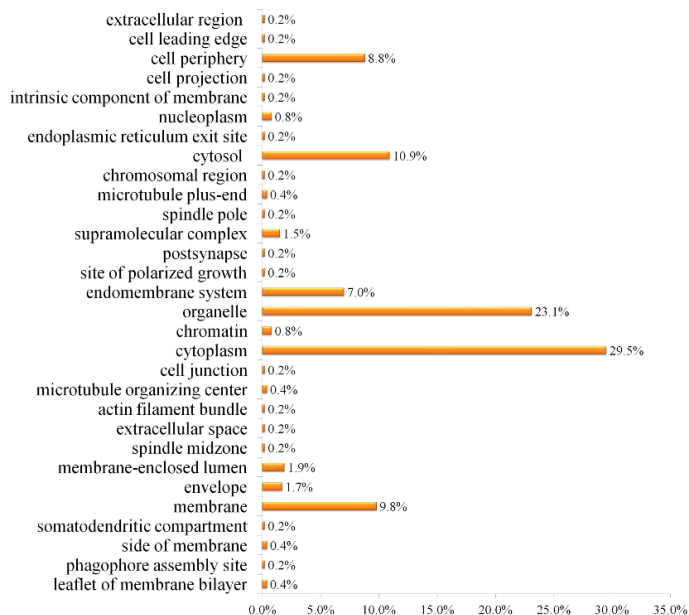

Supplement: Supplementary file 2 [file 1]

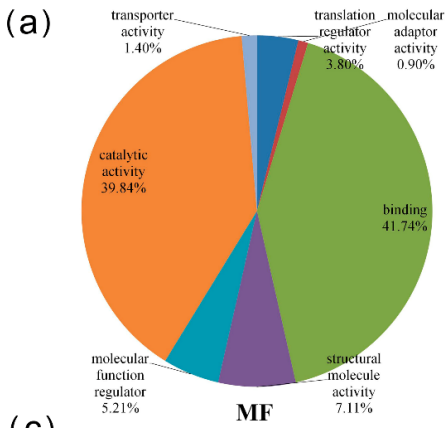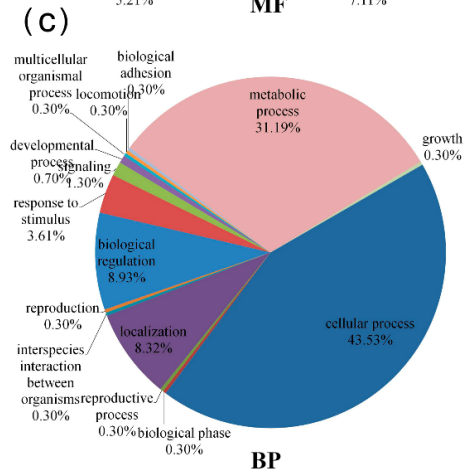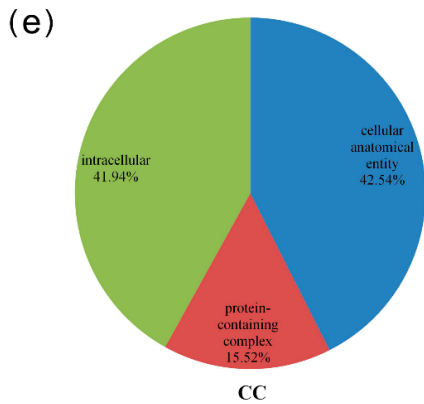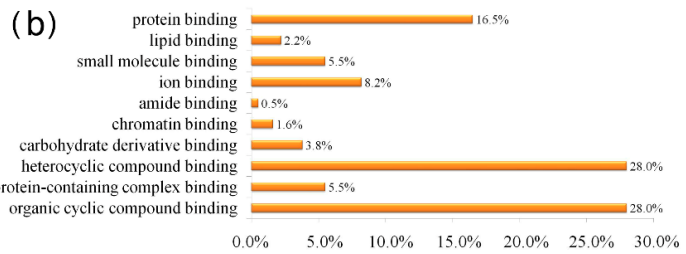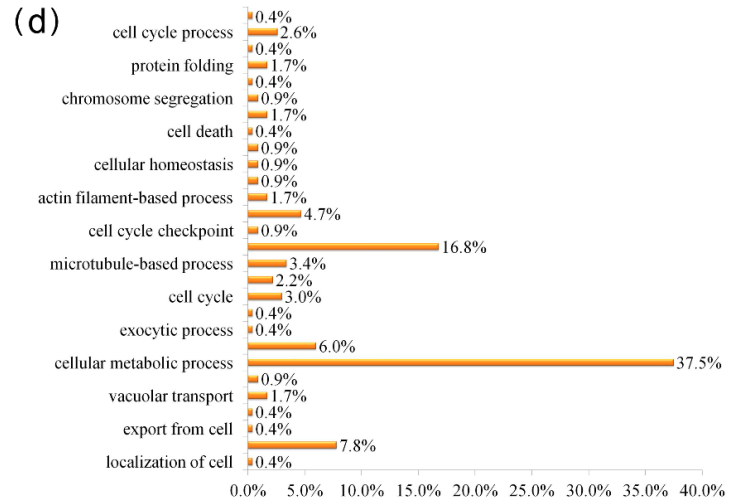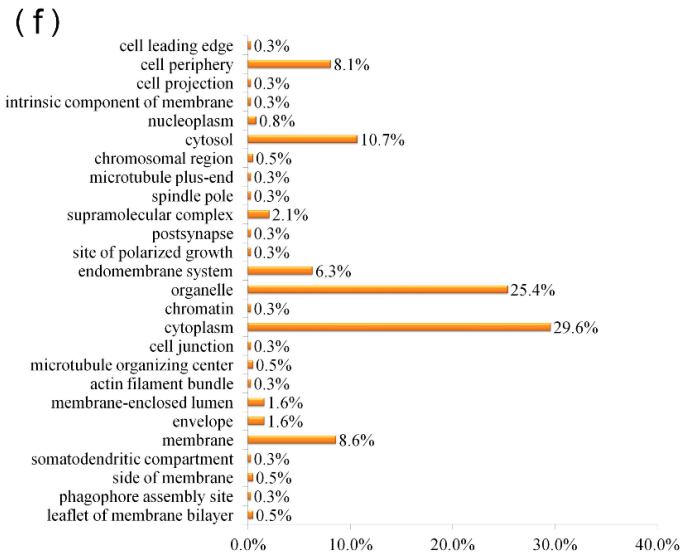

Supplement: Supplementary file 3 [file 1]
